# Supplementary material for: Metal ion biosorption on chitosan for the synthesis of advanced materials
Source: Springer Nature journal article supplement (doi:10.1007/s10853-014-8301-5), 2014-05-20
Supplement: MOESM1 [file 3525950]

**Additional Material Section**

Molybdate speciation [[1](#_ENREF_1)]

MoO42- + H3O+ = HMoO4- + H2O log K: 3.89

MoO42- + 2 H3O+ = H2MoO4 + 2 H2O log K: 7.50

7 MoO42- + 8 H3O+ = Mo7O246-  + 12 H2O log K: 57.74

7 MoO42- + 9 H3O+ = Mo7O23(OH)5- + 13 H2O log K: 62.14

7 MoO42- + 10 H3O+ = Mo7O22(OH)24- + 14 H2O log K: 65.68

7 MoO42- + 11 H3O+ = Mo7O21(OH)33- + 15 H2O log K: 68.21

Vanadate speciation [[1](#_ENREF_1)]

3 VO3-  = V3O93- log K: 7.14

4 VO3-  = V4O124- log K: 10.10

10 VO3-  + 4 H3O+ = V10O286- + 7 H2O log K:

10 VO3-  + 5 H3O+ = V10O27(OH)5- + 7 H2O log K: 57.4

10 VO3-  + 6 H3O+ = V10O26(OH)24- + 8 H2O log K: 61.8

VO2+ + 2 H2O = VO(OH)3(aq) + H3O+ log K: - 3.2

VO2+ + 2 H2O = VO2(OH)2- + 2 H3O+ log K: - 7.0

VO2(OH)2- + H2O = VO3(OH)2- + H3O+ log K: - 7.8

Cu/Citrate system speciation (primary references: [[1](#_ENREF_1), [2](#_ENREF_2)]; Reprinted with permission from Elsevier, *Int. J. Biol. Macromol.*, 2003, 33(1), 57)

[1] CF Baes, Jr., RE Mesmer (1976) Hydrolysis of Cations. Wiley, NY

[2] DD Perrin (1979) Stability Constant of Metal-Ion Complexes - Part B - Organic ligands. Pergamon Press, Oxford, U.K.

Figure AM1: Partially acetylated chitosan (heteropolymer composed of glucosamine, GlcN, and acetylglucosamine, AcGlcN, units).

Figure AM2: Examples of the different mechanisms involved in metal binding on chitosan.

Figure AM3: Molybdate sorption isotherms at different pHs – plots of the Langmuir equation: q vs. Ceq*, where Ceq* is the total concentration of molybdate adsorbable species; i.e., polynuclear hydrolyzed species) (Reprinted with permission from Taylor & Francis, *Sep. Sci. Technol.*, 2000, 35 (7), 1021)
